# Supplementary material for: The effect of hydroxyl on the solution behavior of a quaternary ammonium gemini surfactant
Source: Royal Society of Chemistry journal article supplement (doi:10.1039/c7cp00131b), 2017-01-01
Supplement: c7cp00131b1.pdf [file c7cp00131b1.pdf]

## *Supporting Information*

### **The effect of hydroxyl on the phase behavior of quaternary ammonium gemini surfactant**

Xuepeng Wu, Caili Dai,\* Sisi Fang, Hao Li, Yining Wu, Xin Sun, Mingwei Zhao†

*School of Petroleum Engineering, State Key Laboratory of Heavy Oil Processing,  
China University of Petroleum (East China), Qingdao, Shandong, 266580, China*

---

\* **Caili Dai:** Fax: +86-532-86981161; Tel: +86-532-86981183;  
Email: daicl@upc.edu.cn

† **Mingwei Zhao:** Fax: +86-532-86981161; Tel: +86-532-86981183;  
Email: zhaomingwei@upc.edu.cn

### Experiment section

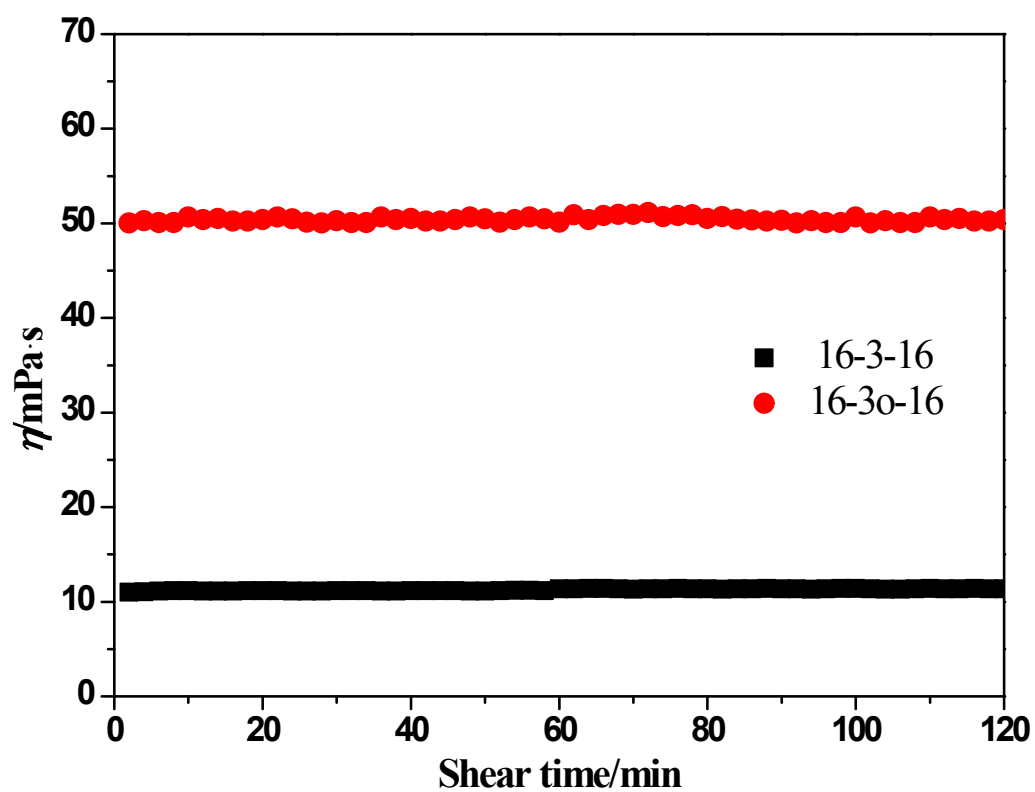

Fig. S1 The shear viscosity of 16-3-16 and 16-3OH-16 as a function of shear time at  $170 \text{ s}^{-1}$  and  $70 \text{ }^\circ\text{C}$ .

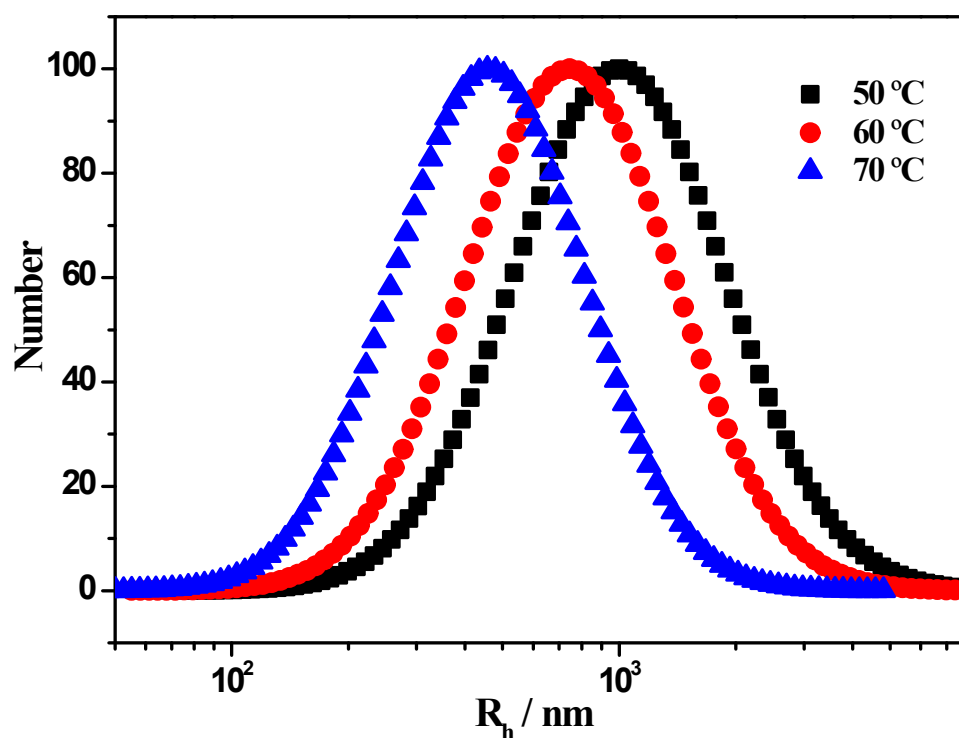

Fig. S2 Apparent hydrodynamic diameter distribution of 50 mM 16-3OH-16 at different temperatures.

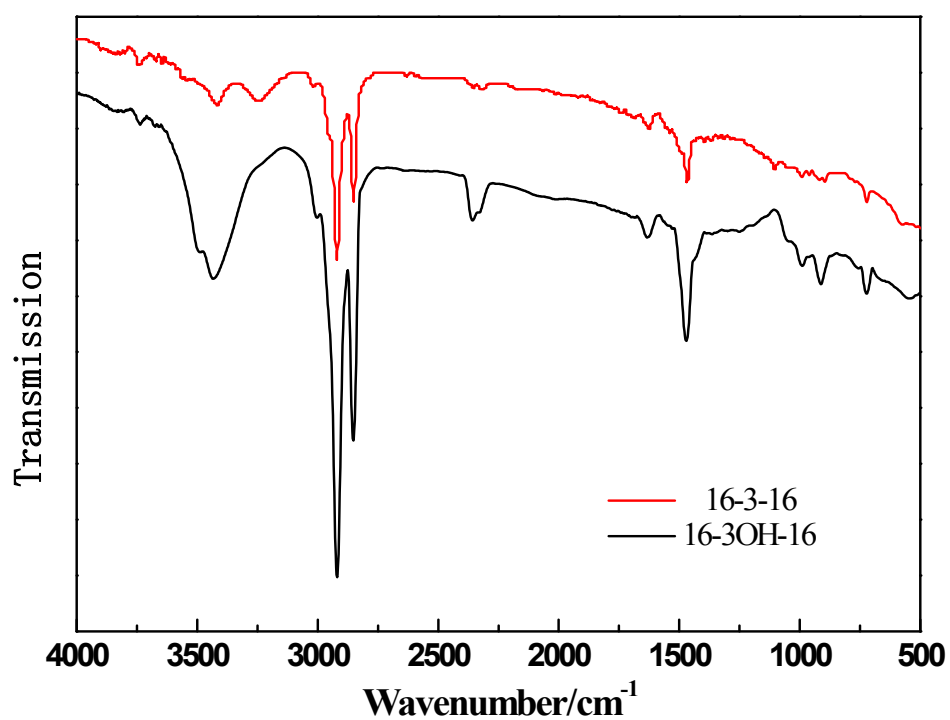

Fig. S3 FTIR spectra for samples of 16-3-16 and 16-3OH-16 in dry solid state (KBr disks method).

### Simulation section

**Table S1** Interaction energy & contributors

| Systems   | Energy, kcal/mol   |         |               |
|-----------|--------------------|---------|---------------|
|           | Interaction energy | vdW     | Electrostatic |
| 16-3-16   | -424.953           | -15.419 | -408.652      |
| 16-3OH-16 | -438.036           | -13.673 | -423.513      |

Natural bond orbitals calculations were performed using NBO program as implemented in the Gaussian09 package at the B3LYP method and 6-31G basis set in order to study second-order interactions.

**Table S2** Selected natural atomic charges and natural electron configuration for the  
16-3-16

| Atom   | Net charge | Electron configuration            |
|--------|------------|-----------------------------------|
| N1-117 | -0.14826   | [core]2S( 0.63)2p( 2.01)          |
| N2-64  | -0.14905   | [core]2S( 0.63)2p( 2.01)          |
| C1-65  | -0.13498   | [core]2S( 0.52)2p( 1.61)3p( 0.01) |
| C2-53  | -0.25633   | [core]2S( 0.52)2p( 1.73)          |
| C3-50  | -0.13474   | [core]2S( 0.52)2p( 1.61)3p( 0.01) |

**Table S3** Selected natural atomic charges and natural electron configuration for the  
16-3OH-16

| Atom   | Net charge | Electron configuration            |
|--------|------------|-----------------------------------|
| N1-116 | -0.14867   | [core]2S( 0.63)2p( 2.01)          |
| N2-63  | -0.14951   | [core]2S( 0.63)2p( 2.02)          |
| C1-64  | -0.14944   | [core]2S( 0.52)2p( 1.62)3p( 0.01) |
| C2-53  | 0.01876    | [core]2S( 0.48)2p( 1.50)3p( 0.01) |
| C3-50  | -0.14848   | [core]2S( 0.52)2p( 1.63)3p( 0.01) |
| O1-125 | -0.37505   | [core]2S( 0.85)2p( 2.52)          |

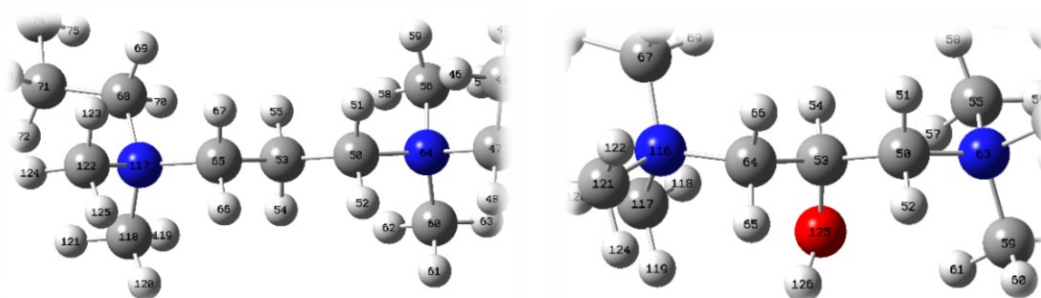

**Fig. 4S** Atom label in the simulation structural of 16-3-16 (left) and 16-3OH-16  
(right).

Table S4 Second order perturbation theory analysis of Fock matrix in NBO basis  
corresponding to the intramolecular bonds of the 16-3OH-16.

| Donor   | Acceptor     | $E_h$ (kcal/mol) | $E$ (a.u.) | $F$ (a.u.) |
|---------|--------------|------------------|------------|------------|
| LP O125 | BD* C53-C64  | 2.03             | 0.63       | 0.045      |
|         | BD*C59-H61   | 1.06             | 0.79       | 0.037      |
|         | BD*C50 - C53 | 3.72             | 0.63       | 0.061      |

$E_h$  means energy of hyperconjugative interactions (stabilization energy in KJ/mol)

$E$ (a.u.) means energy difference between donor and acceptor  $i$  and  $j$  NBO orbitals

$F$ (a.u.) is the Fock matrix elements between  $i$  and  $j$  NBO orbitals.

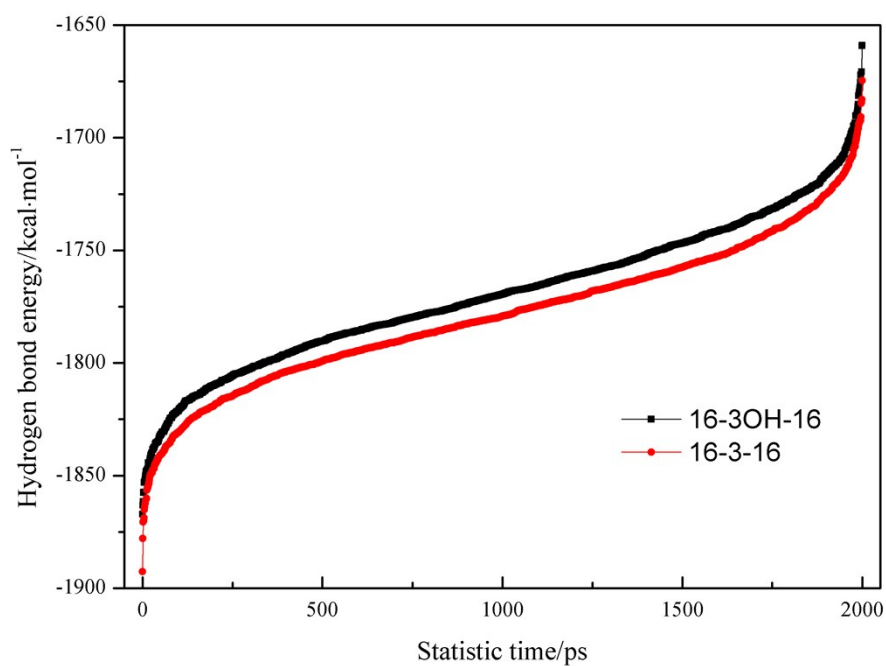

Fig. 5S The average hydrogen bond energy of two system over the entire stimulate  
time.

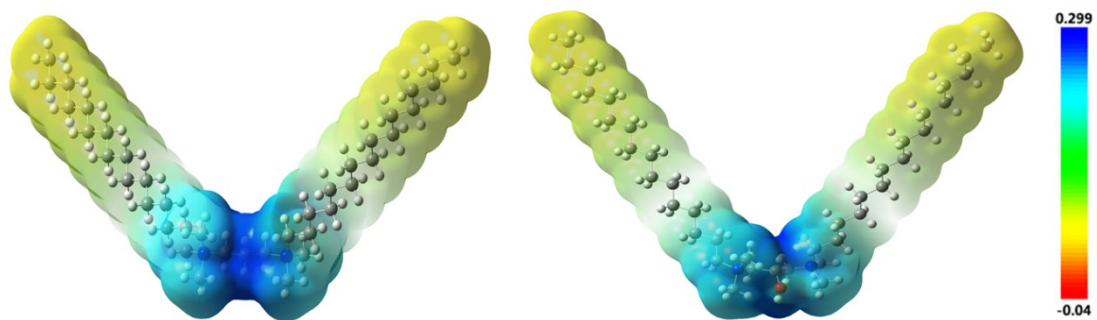

Fig. 6S Electrostatic potentials, in hartrees, at the  $0.001 \text{ e/bohr}^3$  isodensity surfaces of 16-3-16 and 16-3OH-16 counterions in water medium.

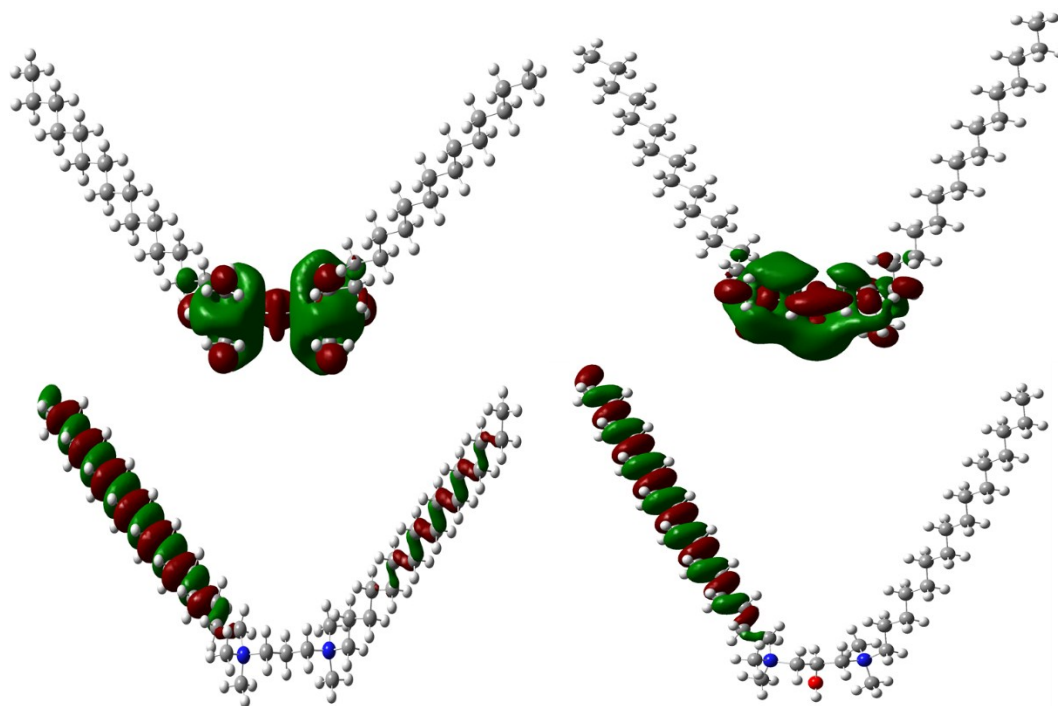

Fig. 7S The optimized configurations of 16-3-16 and 16-3OH-16 HOMO-LUMO for the respective compounds in water medium.
